# Supplementary material for: Efficient α-selective chlorination of phenylacetic acid and its para-substituted analogues
Source: Royal Society of Chemistry journal article supplement (doi:10.1039/d5ra00198f), 2025-01-01
Supplement: d5ra00198f2.pdf [file d5ra00198f2.pdf]

- I confirm that no synthesis or characterisation of compounds is reported in this manuscript.**

[illegible]

[illegible]
